# Supplementary material for: Plasma Sphingosine-1-Phosphate Levels Are Associated with Progression of Estrogen Receptor-Positive Breast Cancer
Source: MDPI journal article supplement (doi:10.3390/ijms222413367), 2021-12-13
Supplement: s1 [file s1]

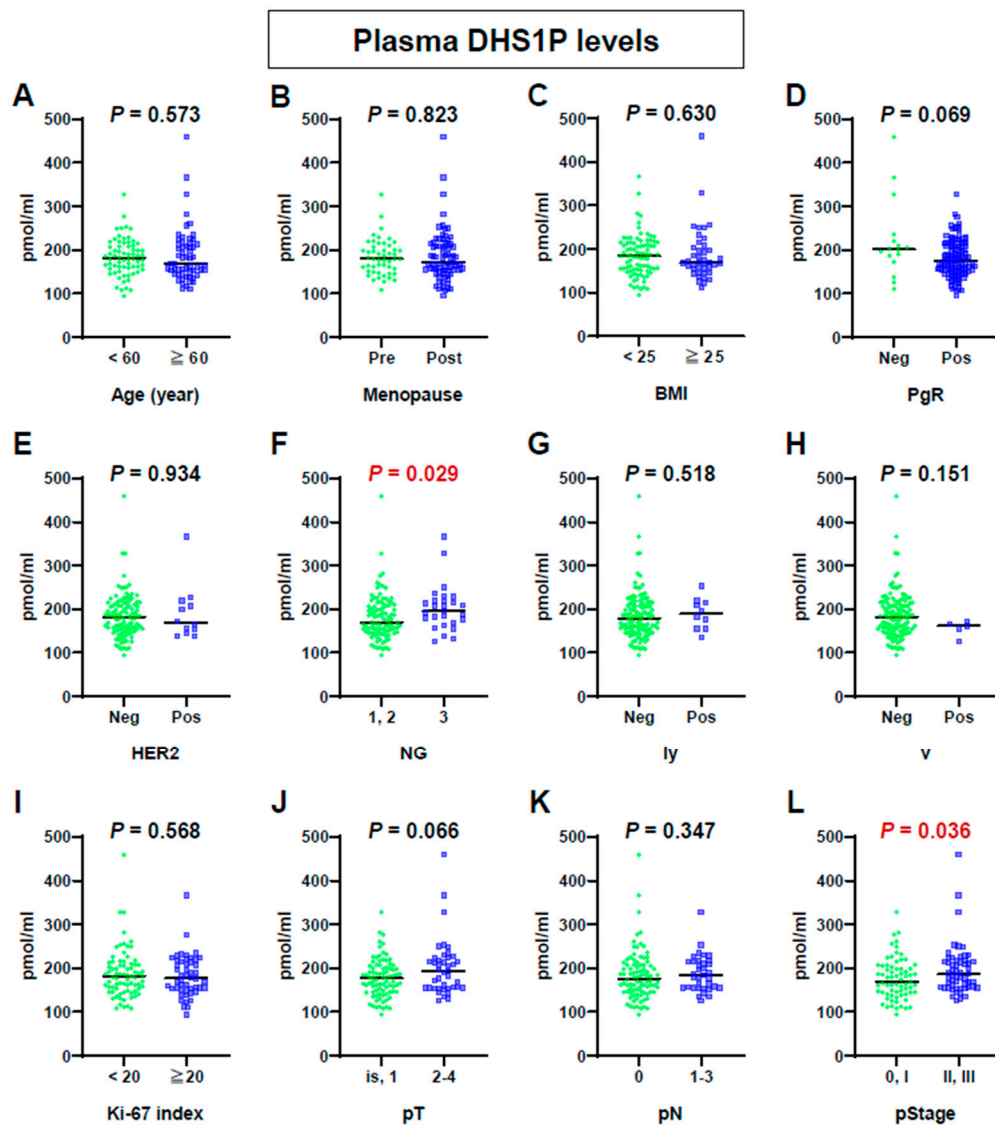

**Figure S1:** Dihy-dro-sphingosine-1-phosphate (DHS1P) levels in plasma of estrogen receptor-positive breast cancer patients.

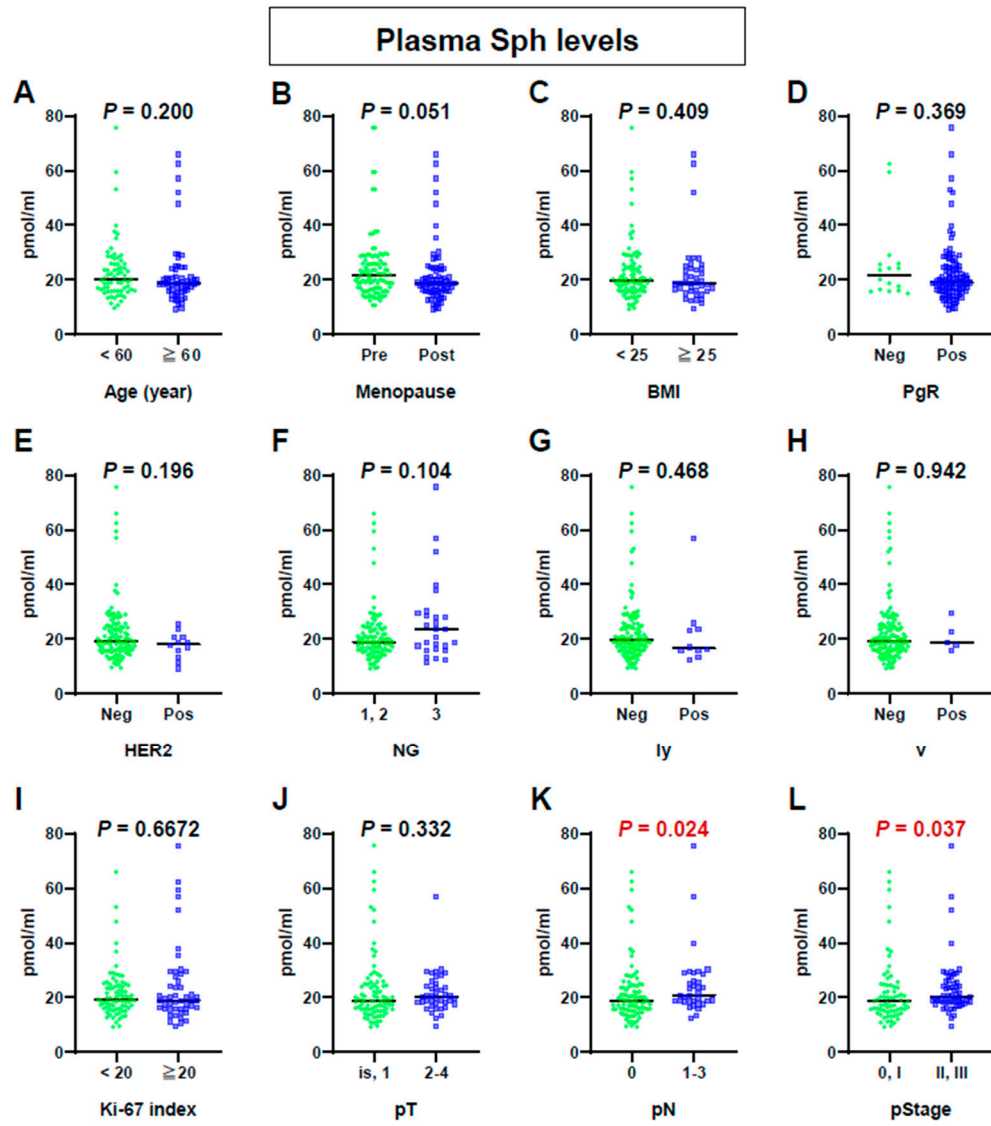

**Figure S2:** Sphingosine (Sph) levels in plasma of estrogen receptor-positive breast cancer patients.

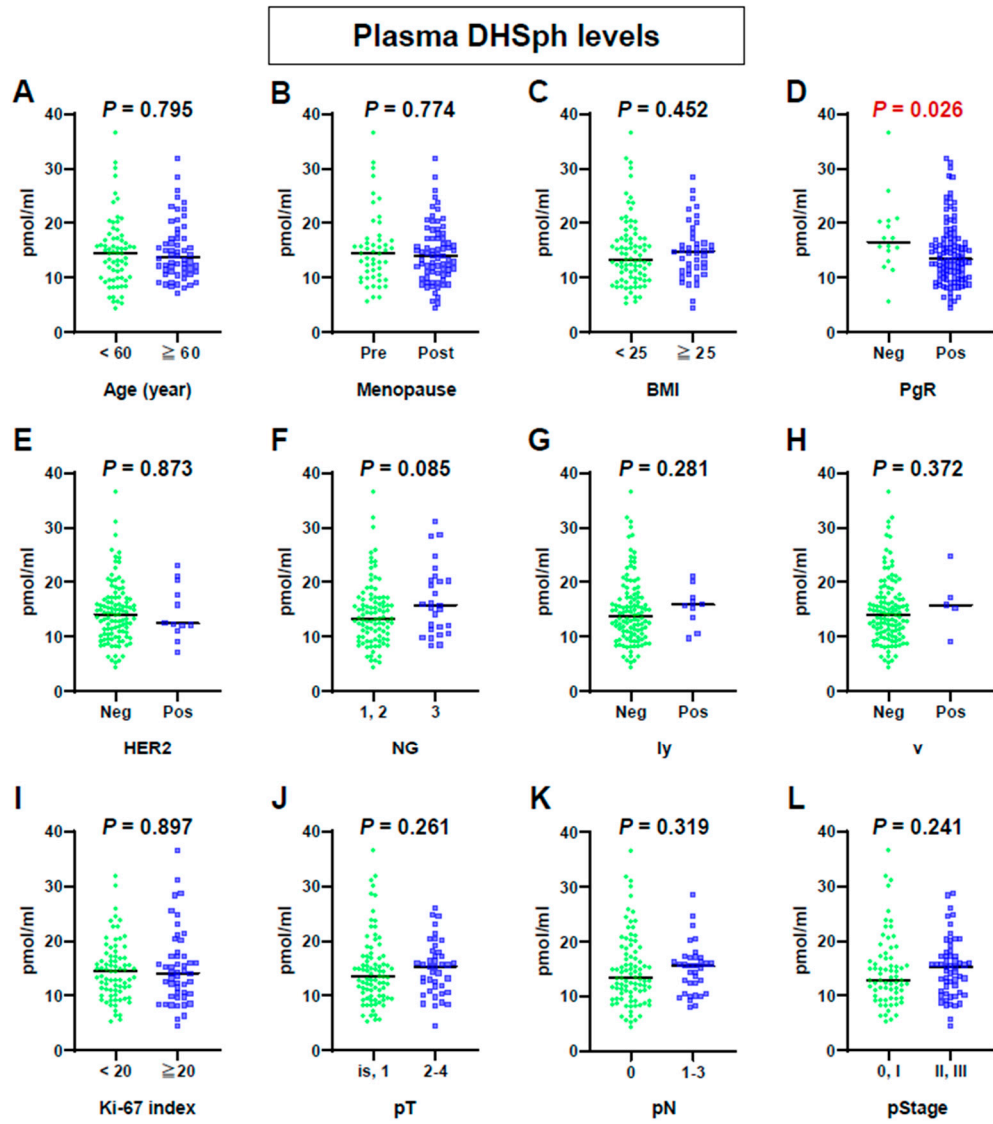

**Figure S3:** Dihydro-sphingosine (DHSph) levels in plasma of estrogen re-cep-tor-positive breast cancer patients.
